# Supplementary material
Source: Springer Nature journal article supplement (https://www.springermedizin.de/resource/supplementary/13075_2009_2770_MOESM1_ESM.pdf/9692850)
Supplement: MOESM1 [file 9692850]

### A MPC proliferation using the WST-1 mitochondrial dehydrogenase cleavage assay.

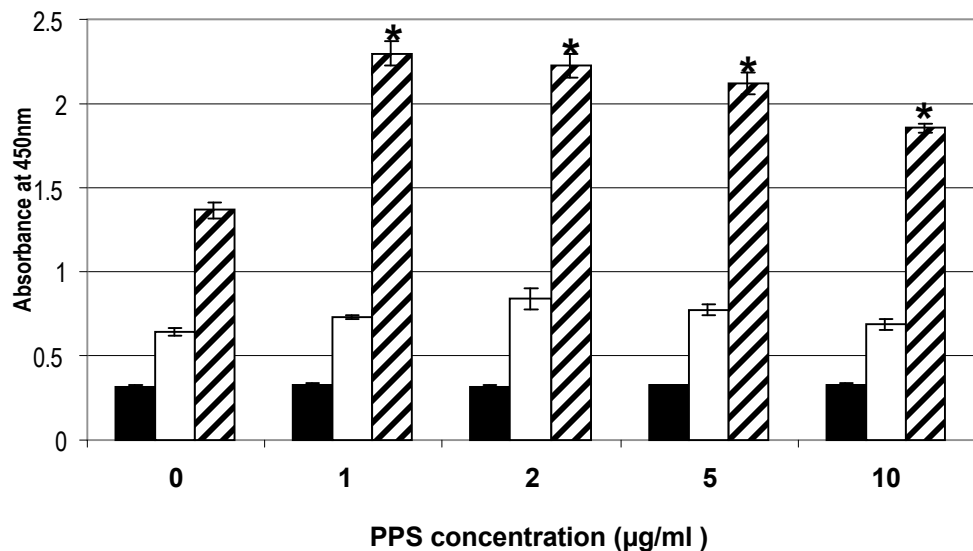

### B DNA Synthesis by MPC as determined by incorporation of 3H-Thymidine into DNA

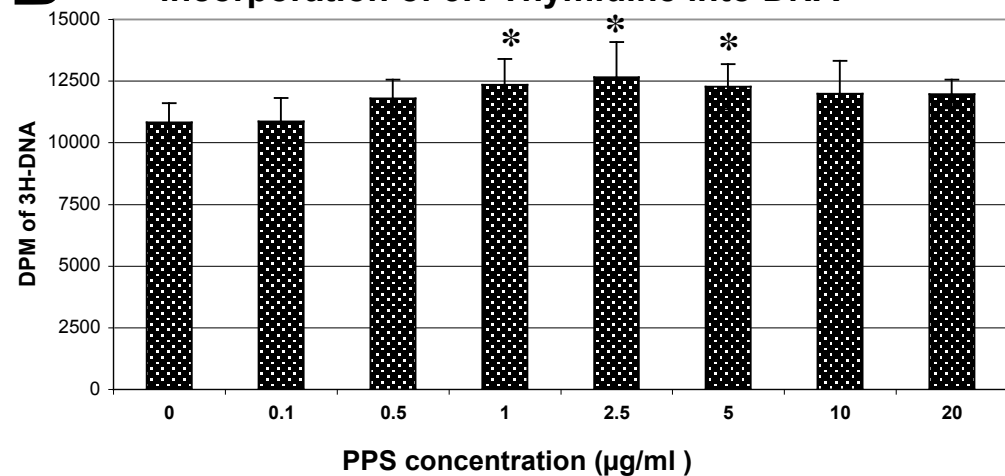

### The Effects of Pentosan Polysulfate (PPS) on MPC Apoptosis

C

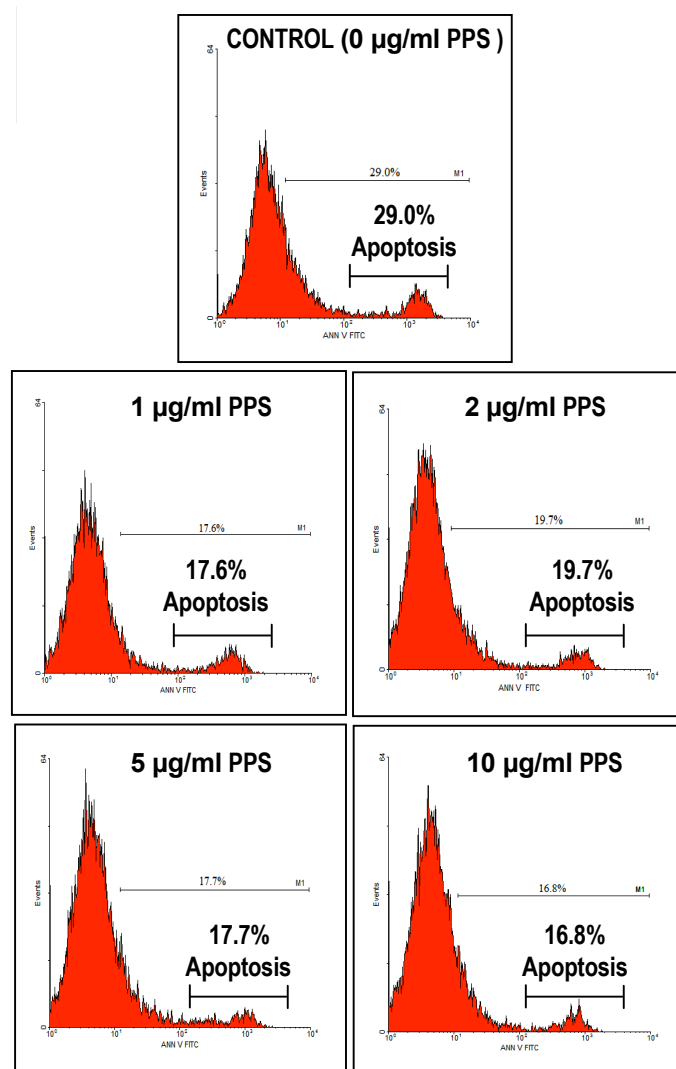

Average decrease in apoptosis = 38%
